# Supplementary material for: Salivary endotoxin detection using combined mono/polyclonal antibody-based sandwich-type lateral flow immunoassay device
Source: Royal Society of Chemistry journal article supplement (doi:10.1039/d3sd00158j), 2023-01-01
Supplement: d3sd00158j1.pdf [file d3sd00158j1.pdf]

## **ELECTRONIC SUPPLEMENTARY INFORMATION**

### **Salivary endotoxin detection using combined mono/polyclonal antibody-based sandwich-type lateral flow immunoassay device**

Daewoo Han<sup>1</sup>, Sancai Xie<sup>2</sup> and Andrew J. Steckl<sup>1</sup>

<sup>1</sup>Nanoelectronics Laboratory, Department of Electrical and Computer Engineering, University of Cincinnati, Cincinnati, OH 45221, USA

<sup>2</sup>Procter & Gamble Co., Mason, OH 45040 USA

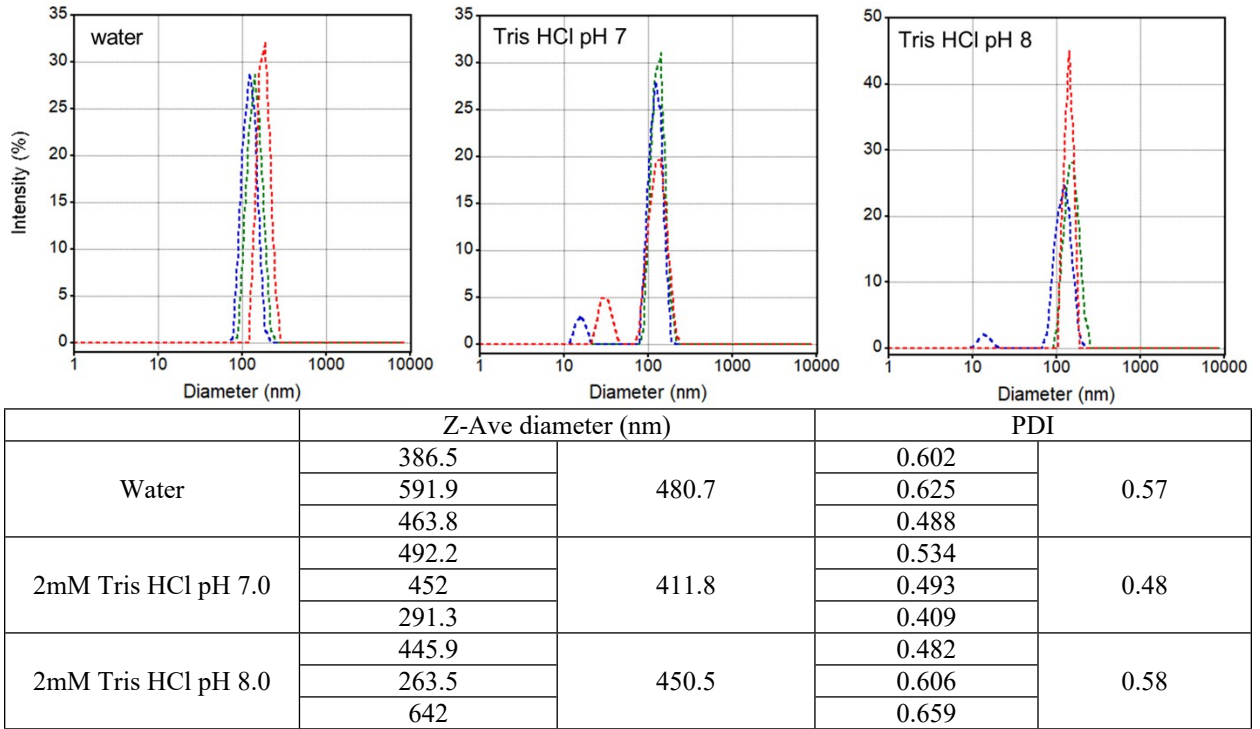

**Fig. S1** LPS aggregate size measurements in different buffer solutions. PG LPS concentration is 10  $\mu$ g/mL. All measurements were done at back-scattered mode using Zetasizer.

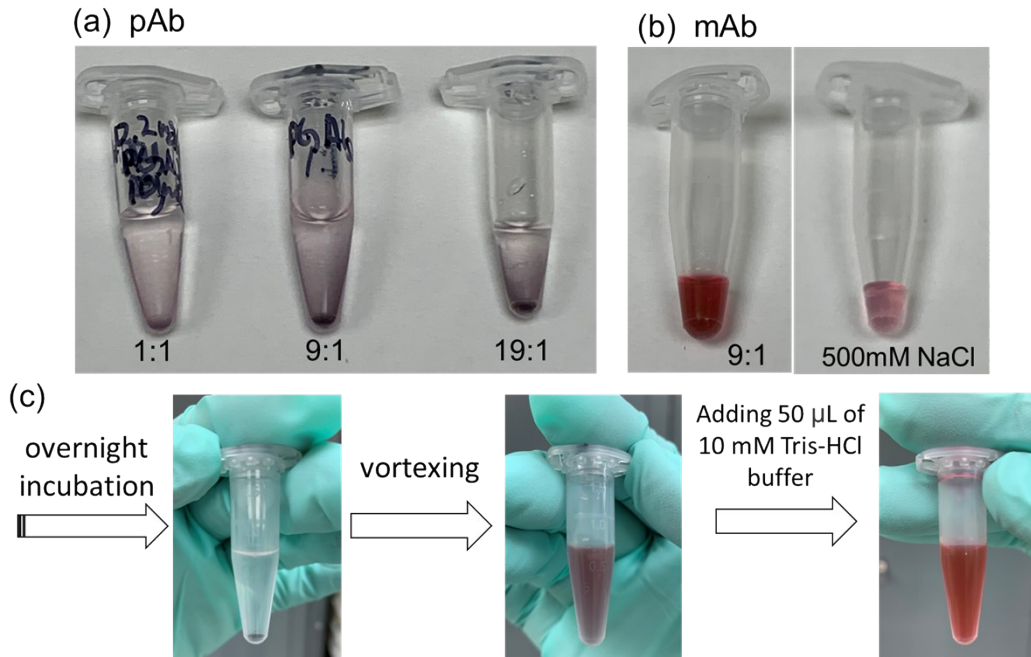

**Fig. S2** Antibody and gold nanoparticle conjugations: (a) polyclonal antibody with different volume ratios of AuNP solution (10 O.D.) and antibody (0.2 mg/mL); (b) monoclonal antibody in 9:1 volume ratio of AuNP solution (10 O.D.) and monoclonal antibody (0.2 mg/mL); high concentration NaCl needed to remove non-specific binding does not result in AuNP aggregation; (c) effect of Tris-HCl (pH 8) buffer addition for redispersing mAb-AuNP conjugates and preventing precipitation.

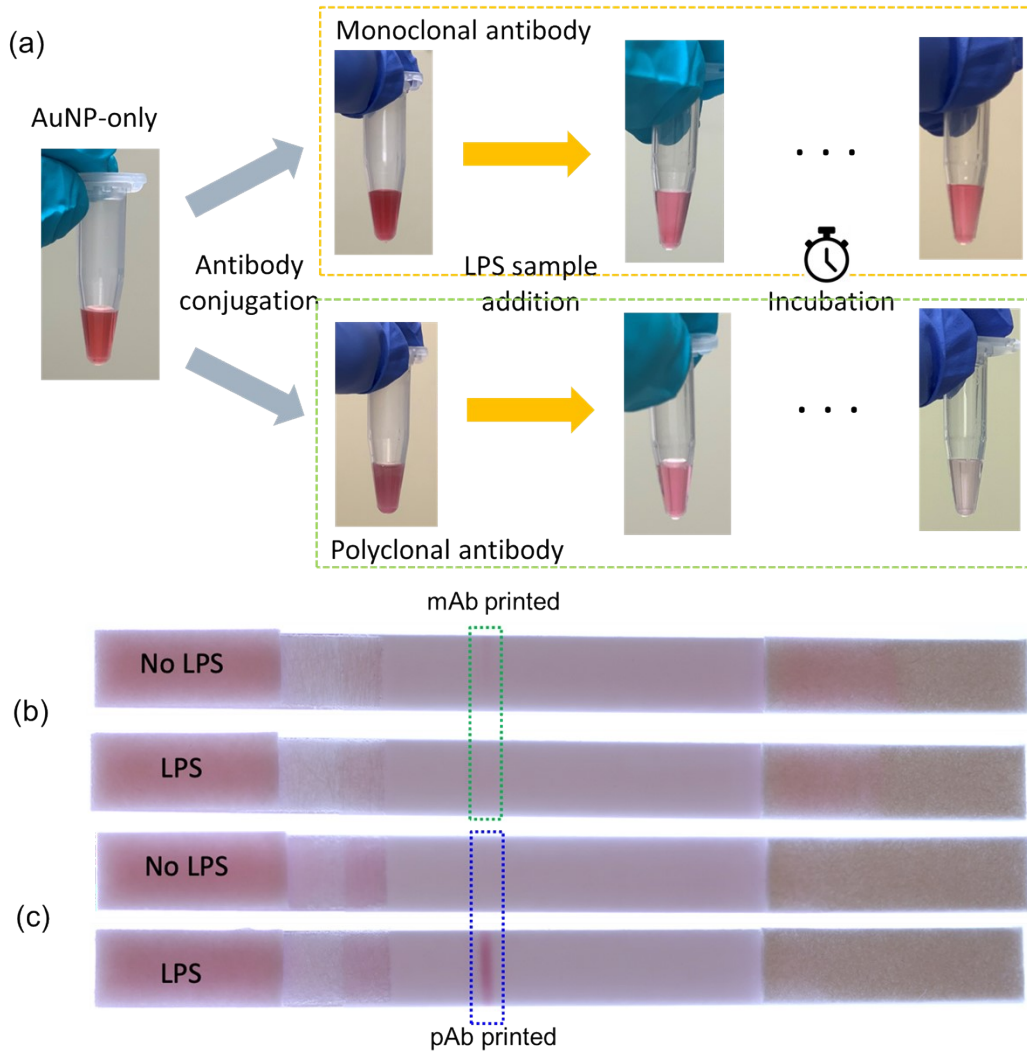

**Fig. S3** Use of monoclonal vs. polyclonal antibodies with LPS: (a) in solution; test line formation with mAb-AuNP conjugate either with or without LPS on LFA devices printed with: (b) mAb, (c) pAb.

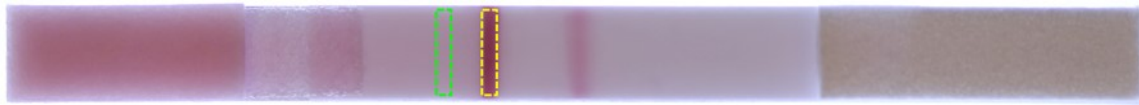

**Fig. S4** Image J analysis of the test line intensity subtracting the mean value of green box area (background) from the mean value of yellow box area.

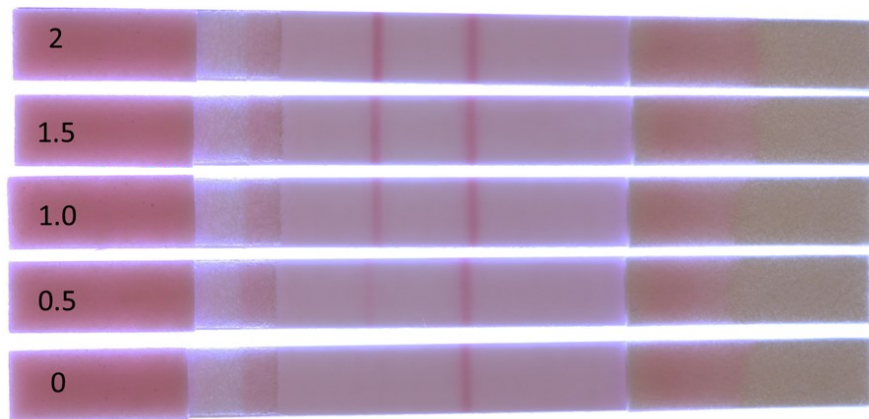

**Fig. S5** Treated saliva tests with several LPS concentrations. PG LPS concentration ( $\mu\text{g/mL}$ ) is shown for each LFA strip
